# 1                    **Uncovering brain tissue architecture across scales with** 2                    **super-resolution light microscopy**

3  
4        Julia M. Michalska<sup>1</sup>, Julia Lyudchik<sup>1</sup>, Philipp Velicky<sup>1</sup>, Hana Korinkova<sup>1</sup>, Jake F. Watson<sup>1</sup>,  
5            Alban Cenameri<sup>1</sup>, Christoph Sommer<sup>1</sup>, Alessandro Venturino<sup>1</sup>, Karl Roessler<sup>2</sup>, Thomas  
6            Czech<sup>2</sup>, Sandra Siegert<sup>1</sup>, Gaia Novarino<sup>1</sup>, Peter Jonas<sup>1</sup>, Johann G. Danzl<sup>1</sup>

7  
8        <sup>1</sup>Institute of Science and Technology Austria, Am Campus 1, 3400 Klosterneuburg, Austria

9        <sup>2</sup>Medical University of Vienna, Department of Neurosurgery, Waehringer Guertel 18-20, 1090  
10        Vienna, Austria

11  
12        correspondence to: [johann.danzl@ist.ac.at](mailto:johann.danzl@ist.ac.at)

## 13 14        **Abstract**

15        Mapping the complex and dense arrangement of cells and their connectivity in brain tissue  
16        demands nanoscale spatial resolution imaging. Super-resolution optical microscopy excels at  
17        visualizing specific molecules and individual cells but fails to provide tissue context. Here we  
18        developed Comprehensive Analysis of Tissues across Scales (CATS), a technology to densely  
19        map brain tissue architecture from millimeter regional to nanoscopic synaptic scales in diverse  
20        chemically fixed brain preparations, including rodent and human. CATS leverages fixation-  
21        compatible extracellular labeling and advanced optical readout, in particular stimulated-  
22        emission depletion and expansion microscopy, to comprehensively delineate cellular  
23        structures. It enables 3D-reconstructing single synapses and mapping synaptic connectivity by  
24        identification and tailored analysis of putative synaptic cleft regions. Applying CATS to the  
25        hippocampal mossy fiber circuitry, we demonstrate its power to reveal the system's  
26        molecularly informed ultrastructure across spatial scales and assess local connectivity by  
27        reconstructing and quantifying the synaptic input and output structure of identified neurons.

## 1 Introduction

2 The challenge of illuminating the complex structure of brain tissue has been a major motivating  
3 force to advance imaging technologies. Optical super-resolution approaches visualize cells and  
4 molecules down to nanoscopic scales, increasing resolution beyond the diffraction limit of a  
5 few hundred nanometers either by increasing instrument resolution<sup>1-4</sup> or by physically  
6 increasing specimen size and hence distances between features<sup>5-8</sup>. Super-resolution  
7 microscopy has generated insights into the molecular organization of synapses<sup>9-11</sup>, the neuronal  
8 cytoskeleton<sup>12</sup>, structure-function relationships in neurons<sup>13</sup>, and tissue organization<sup>14</sup>.  
9 However, in all these cases, analysis is limited to specific molecular targets or sparse subsets  
10 of labeled cells, lacking information about their context within the tissue. Electron microscopy  
11 (EM) provides comprehensive structural contrast and exquisite spatial resolution, but 3D-tissue  
12 reconstruction is technically challenging, laborious, and difficult to complement with  
13 molecular information. Optical technologies that visualize the tissue's architecture and provide  
14 contextual meaning to molecules and cellular structures at high resolution would provide major  
15 opportunities for discovery.

16 Extracellular labeling is a powerful tool to delineate all cells in a tissue volume. It has been  
17 applied to guide patch clamp experiments<sup>15</sup> and visualize extracellular space<sup>16,17</sup> in living brain  
18 tissue, and for early EM-connectomics studies in mouse retina<sup>18</sup>. Reading out freely diffusing,  
19 extracellularly applied fluorophores with stimulated emission depletion (STED)  
20 microscopy<sup>1,19,20</sup> in living brain tissue in the framework of super-resolution shadow imaging  
21 (SUSHI)<sup>17,21-23</sup> casts super-resolved shadows of all cells. We recently showed that extracellular  
22 labeling integrated with a specifically engineered 3D-super-resolution/machine learning  
23 technology enables dense, synapse-level reconstruction of living brain tissue<sup>24</sup>. However, while  
24 live imaging uniquely accesses dynamics, it is constrained by applicable super-resolution  
25 modality, molecular labeling options, addressable tissue volumes, and sample type. In fixed  
26 tissues, feature-rich representations of cells and various tissues have been achieved by several  
27 strategies, including fluorescent<sup>25-29</sup> or Raman<sup>30</sup> contrast for total protein density or other  
28 molecule classes in expansion microscopy (ExM). However, none of these approaches has been  
29 amenable to *in silico* reconstruction of the brain tissue's architecture or sub-cellular  
30 morphology. There is thus an unmet need for an optical technology that is capable of  
31 visualizing and quantifying tissue organization from regional to single-synapse level in a  
32 technologically straightforward manner.

1 Here we developed *Comprehensive Analysis of Tissues across Scales* (CATS), an integrated  
2 labeling, optical imaging, and analysis platform to decode brain tissue architecture, subcellular  
3 morphologies, and molecular arrangements within their structural context. We engineered  
4 CATS to visualize all cellular structures in fixed tissue by extracellular labeling with (super-  
5 resolution) fluorescence microscopy. Thereby, CATS removes the constraints associated with  
6 live imaging and permits analysis from regional to nanoscopic spatial scales for commonly  
7 used native and cultured brain tissue preparations. It capitalizes on the full technology base for  
8 labeling, optically homogenizing, and 3D-super-resolution imaging available for fixed tissues,  
9 building on the pertinent strengths of STED and expansion microscopy, in a widely adoptable  
10 approach. With specifically tailored analysis, CATS quantitatively reveals tissue architecture,  
11 maps synaptic connectivity, and allows 3D-reconstruction of subcellular morphology down to  
12 single-synapse level in a molecularly informed fashion. To demonstrate the power of this  
13 approach to quantify synaptic connectivity and structure, we characterized one of the key  
14 synapse types in the hippocampal circuitry. We reveal the synaptic input and output structure  
15 of identified, functionally recorded neurons across brain regions, and furthermore apply the  
16 technique to clinically derived human tissue samples.

17

## 18 **Results**

### 19 **CATS unravels tissue architecture at super-resolved detail**

20 We developed two strategies for revealing tissue structure by selective labeling of the  
21 extracellular domain (**Fig. 1a**): i) “Compartment CATS” (coCATS) applies covalently binding  
22 labeling compounds to the *extracellular compartment* in living tissue, with intact membrane  
23 boundaries constraining labeling to the extracellular space and cell surfaces. ii) “Resident  
24 CATS” (rCATS) labels classes of *extracellularly resident* molecules, in particular extracellular  
25 polysaccharides. This makes CATS applicable also to specimens where live labeling is not  
26 possible (**Fig. 1b**). Both approaches revealed the cellular architecture of brain tissue, for  
27 example in the hippocampal region, across scales (**Fig. 1b,c**).

28 To analyze brain architecture with coCATS, we screened for molecules providing high extra-  
29 to intracellular contrast, high labeling density, and compatibility with downstream super-  
30 resolution readout in organotypic hippocampal slice cultures (**Supplementary Fig. 1**). We  
31 focused on commercially available compounds for easy adoptability. We ensured cell  
32 impermeability either via hydrophilic, anionic fluorophores or additional sulfo- or polyethylene

1 glycol (PEG) groups. As expected, chemistries targeting primary amines, including N-  
2 hydroxysuccinimide (NHS) and tetra- (TFP) and pentafluorophenyl (PFP) esters, effectively  
3 mediated homogeneous labeling by covalent attachment to extracellular and cell surface  
4 molecules, particularly proteins. For readout, we used either directly conjugated fluorophores  
5 or a small molecule reporter (biotin/fluorescent avidin).

6 For decrypting near-natively preserved brain at super-resolved detail, we performed *in vivo*-  
7 stereotactic injection of an NHS-derivative of a hydrophilic, far-red, high-performance STED  
8 fluorophore followed by transcardial fixative perfusion. Injection into the brain lateral ventricle  
9 labeled areas adjacent to the ventricular system, distant from the lesioned region at the injection  
10 site (**Supplementary Fig. 2**). STED microscopy provides direct, “all optical” super-resolved  
11 readout by applying a light pattern that confines fluorescence ability to volumes smaller than  
12 the diffraction limit. We first focused on hippocampus, a brain region central to spatial  
13 navigation and memory with well-characterized fundamental circuitry. As an important  
14 component, mossy fibers originating from dentate gyrus (DG) granule cells convey excitatory  
15 input to pyramidal neurons in the CA3 *stratum lucidum*, forming key synapses in the  
16 hippocampal trisynaptic circuit. These synapses are an established model for functional  
17 synapse characterization and contribute to higher order computations<sup>31,32</sup>. STED imaging at the  
18 transition between *stratum pyramidale* and *stratum lucidum* of the CA3 region revealed the  
19 complex arrangement of cell bodies, dendrites, bundles of thin axons, and synaptic terminals  
20 at high signal-to-noise ratio (SNR) (**Fig. 1d**). Diffraction-unlimited resolution, here on the  
21 order of 60 nm laterally, was indispensable to resolve the cellular structures in this extremely  
22 complex and dense arrangement (**Supplementary Fig. 3**). For example, we were able to  
23 resolve the individual unmyelinated axons in mossy fiber bundles, most conspicuous as small  
24 circular structures when transversely optically sectioned. When complemented with  
25 immunolabelling for the pre-synaptic marker BASSOON and for SHANK2, a scaffolding  
26 protein in post-synaptic densities of excitatory synapses, CATS assigned molecularly defined  
27 synaptic sites to individual pre-synaptic boutons of mossy fibers and revealed their location  
28 within the tissue’s ultrastructure (**Fig. 1d-f**). It revealed both pre- and post-synaptic structures,  
29 showing the complex arrangement of large mossy fiber boutons (MFBs) containing multiple  
30 transmission sites. These contact complex pyramidal neuron spines<sup>33</sup> termed “thorny  
31 excrescences”. Such contextual structural meaning was missing with immunostainings alone  
32 or sparse labeling of a subset of cells by gold-standard cytosolic fluorescent protein expression  
33 (**Supplementary Fig. 4**).

34



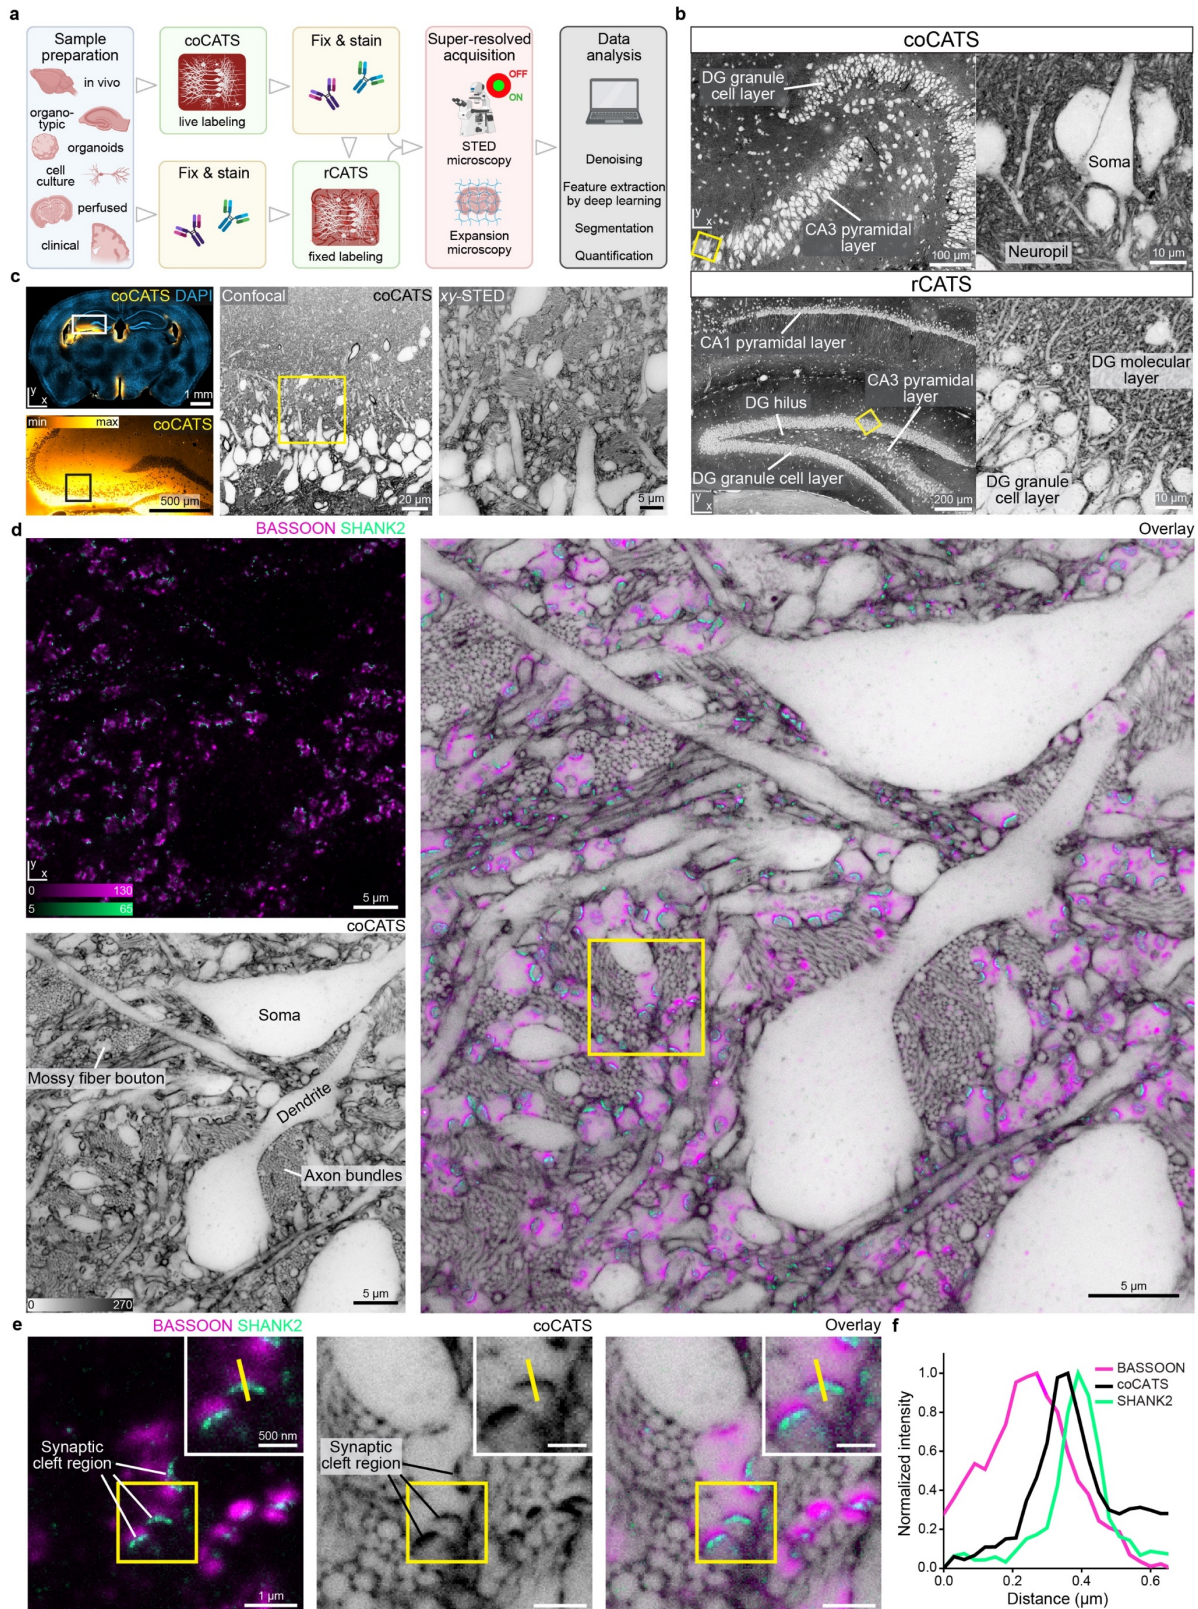

1

2 **Fig. 1| Comprehensive analysis of tissue across scales (CATS).** **a**, Platform for tissue  
 3 analysis including live extracellular labeling (compartment CATS, coCATS) or extracellular  
 4 labeling in previously fixed tissue (resident CATS, rCATS), optional molecular staining, super-  
 5 resolved acquisition, and machine learning/conventional analysis. **b**, (*Top*) CoCATS labeling

1 in organotypic hippocampal slice, revealing gross architecture of the dentate gyrus (DG) and  
2 CA3 region, and zoomed view of boxed region (confocal). (*Bottom*) RCATS labeling in  
3 perfusion-fixed adult mouse coronal section, showing hippocampus with zoomed view.  
4 Intensity lookup tables (LUTs) for CATS are inverted throughout, i.e. black regions correspond  
5 to high labeling intensity, unless otherwise noted. Raw data. **c**, Progressive zoom from  
6 hippocampal regional to cellular scale in CA3 *stratum pyramidale* and *stratum lucidum*.  
7 CoCATS labeling by *in vivo* stereotactic injection into the lateral ventricle (LV) of adult mouse  
8 (*left*: LUT not inverted, *left bottom*: gamma correction applied). *Left, center*: confocal; *right*:  
9 STED, lateral resolution increase (*xy*-STED). Raw data. **d**, Super-resolved tissue architecture  
10 of mouse CA3 *stratum pyramidale/lucidum*, after *in vivo* coCATS label microinjection into LV.  
11 (*Left top*) Immunostaining of pre-synaptic BASSOON (magenta, confocal) and post-synaptic  
12 SHANK2 (turquoise, *xy*-STED). (*Left bottom*) coCATS (*xy*-STED) of same region. (*Right*)  
13 Overlay placing synaptic markers into structural context, including mossy fiber boutons  
14 (MFBs). Raw data. **e**, Magnified view from d (boxed), focusing on a MFB with multiple synaptic  
15 sites, amidst bundles of thin mossy fiber axons. Inset: magnification of synaptic transmission  
16 site. High-intensity coCATS labeling pinpoints dense/protein-rich features between pre- and  
17 post-synapses corresponding to putative synaptic cleft regions (pSCRs). **f**, Line profile as  
18 indicated in e, showing sandwich arrangement of BASSOON, high-intensity coCATS (pSCR),  
19 and SHANK2 signals.

---

20

## 21 **Quantifying single synapse structure and connectivity**

22 When inspecting the combined structural/molecular data more closely, we discovered that  
23 coCATS labeling consistently produced high-intensity features sandwiched between pre- and  
24 post-synapses. These correspond to putatively primary amine/protein-rich extracellular regions  
25 at apparent synaptic transmission sites, likely reflecting the high protein density of the synaptic  
26 cleft<sup>34</sup> (**Fig. 1e,f**). We clarified their spatial relationship with a range of additional synaptic  
27 molecules (SYNAPTOPHYSIN1, HOMER1, vesicular GABA transporter (VGAT), vesicular  
28 glutamate transporter (VGLUT1), N-CADHERIN) both in excitatory and inhibitory synapses  
29 and with sparsely labeled MFBs (**Supplementary Fig. 5**). Taken together, we found their  
30 location consistent with synaptic clefts. This prompted us to designate them “putative synaptic  
31 cleft regions” (pSCRs) and develop an automated pipeline for segmenting and mapping them  
32 (**Fig. 2a**). After enhancing volumetric datasets with a deep-learning-based denoising algorithm  
33 (Noise2Void<sup>35</sup>, N2V, **Supplementary Fig. 6,7**), we used super-resolved SHANK2  
34 immunostaining as guide to excitatory synapses and performed locally confined thresholding  
35 to isolate high-intensity coCATS features. We classified them as pSCRs in case of apposition



1 with pre-synaptic BASSOON (confocal) and post-synaptic SHANK2 (STED) in a triple-  
2 sandwich arrangement. This also eliminated false positive synapse identifications from  
3 unavoidable background in immunostainings (**Supplementary Fig. 8**). Finally, we performed  
4 instance segmentation of individual pSCRs, applied manual proofreading, and contextualized  
5 them by association with manually created volume segmentations of MFBs. Automated  
6 analysis substantially reduced human processing time compared to manual pSCR  
7 segmentation.

8 Using this pipeline, we reconstructed individual synaptic boutons with their synaptic  
9 transmission topology in 3D. Reconstruction is limited by the least resolved spatial axis, i.e.  
10 along the optical ( $z$ -)axis. We therefore applied a dedicated light pattern for near-isotropic  
11 STED-resolution<sup>1</sup> ( $z$ -STED, **Supplementary Fig. 3**) and recorded 3 volumetric datasets in the  
12 CA3 *stratum lucidum* ( $\sim 30 \times 30 \times 12 \mu\text{m}^3$ , 2 brain slices, 1 animal). We selected 10 prominent  
13 MFBs from each, manually segmented their 3D-shape from the coCATS channel, and  
14 quantified both key geometrical parameters and pSCRs (**Fig. 2b-h**, **Supplementary Video 1,2**,  
15 **Supplementary Fig. 9**). Individual boutons varied widely in size and shape, with mean volume  
16  $\bar{V}_{\text{MFB}} = 13.6 \pm 5.0 \mu\text{m}^3$  ( $\pm$  s.d., **Fig. 2c**) and mean surface area  $\bar{A}_{\text{MFB}} = 53.5 \pm 16.6 \mu\text{m}^2$  (**Fig. 2d**).  
17 These values are consistent with previous EM results from adult mouse<sup>36</sup> ( $\bar{V}_{\text{MFB}} = 13.5 \mu\text{m}^3$ ,  
18  $\bar{A}_{\text{MFB}} = 66.5 \mu\text{m}^2$ ). Mean surface area was smaller in our case as we did not include filopodial  
19 structures extending from the main bouton, as they are at the limit of the resolution used in this  
20 measurement. PSCRs were similarly diverse, often forming fenestrated structures (**Fig. 2b**).  
21 To identify regions of MFBs occupied by putative active zones, we related pSCRs to MFB  
22 segmentations. For this, we identified pSCR voxels that touched voxels of segmented MFBs,  
23 extracted the contacting surfaces and turned them into 3D-meshes. The total area of individual  
24 boutons occupied by pSCRs ( $A_{\text{pSCR/MFB}}$ ) had a mean value of  $\bar{A}_{\text{pSCR/MFB}} = 4.6 \pm 1.6 \mu\text{m}^2$  (**Fig. 2e**).  
25 The fraction of MFB surface occupied by pSCRs ( $A_{\text{pSCR/MFB}}/A_{\text{MFB}}$ ) calculated at individual  
26 bouton level displayed smaller spread, hinting towards a correlation between MFB size and the  
27 extent of synaptic release sites. Indeed, when plotting  $A_{\text{pSCR/MFB}}$  as a function of MFB volume  
28 (**Fig. 2f**) (Pearson correlation coefficient  $r = 0.844$ , 95% confidence interval (CI): 0.694-0.923,  
29  $p < 0.0001$ ,  $R^2 = 0.72$ , 30 MFBs) or surface area (**Fig. 2g**) ( $r = 0.841$ , CI: 0.689-0.922,  $p < 0.0001$ ,  
30  $R^2 = 0.71$ , 30 MFBs), we found strong correlation, indicating that larger MFBs also engage more  
31 extensively in synaptic contacts. This is in accordance with previous studies showing a linear  
32 relationship between MFB volume and active zone extent both in organotypic slice cultures  
33 and *in vivo*<sup>37</sup>. Interestingly, the fraction of MFB surface area occupied by pSCRs ( $8.6 \pm 1.7\%$ )

1 was consistent with previous quantifications of MFB surface area occupied by active zones in  
2 serial sectioning EM in adult rat on a smaller number of MFBs (9.7%)<sup>38</sup>. The number of pSCRs  
3 showed large variability between individual boutons (3-28, mean 13.03±5.93), similar as in an  
4 EM study on adult rat<sup>38</sup>, and also correlated with bouton size (**Supplementary Fig. 9**). These  
5 data demonstrate that CATS can identify synaptic transmission sites and deliver quantitative  
6 biological data at single synapse level. Our data are consistent with EM-reconstructions<sup>36,38,39</sup>  
7 but include molecular information and can be obtained without complex sample preparation or  
8 serial sectioning procedures and with high experimental throughput (imaging time for 3-  
9 channel measurement per volume: ~1.5 h).

10

### 11 **Deep-learning-based prediction of synapse location**

12 Based on the prominence of pSCRs in coCATS data, we hypothesized that coCATS may reveal  
13 synapse location based on local tissue structure. We thus trained a convolutional neural  
14 network with U-net architecture<sup>40</sup> to predict synapse location purely from CATS structural data  
15 using deep-learning-based image translation (**Fig. 2i, Supplementary Fig. 10**). For training,  
16 we provided the network with near-isotropically super-resolved coCATS data paired with  
17 immunostainings as molecular ground truth. We used the resulting model to predict molecule  
18 location in unseen datasets. Indeed, a model trained on coCATS and super-resolved  
19 BASSOON, present in excitatory and inhibitory synapses, was capable of guiding  
20 segmentation of pSCRs in mossy fiber boutons. The network prediction can replace the  
21 immunostainings in the pipeline above for pSCR segmentation. This is remarkable, as  
22 thresholding alone, neglecting local context, was insufficient to identify pSCRs among dense  
23 CATS features. For validation, we correlated predicted BASSOON signal with immunolabeled  
24 BASSOON in datasets not included in the training (**Supplementary Fig. 10**, Pearson  
25 correlation,  $r=0.818$ ). In addition to voxel-based correlation, we evaluated resulting automated  
26 pSCR segmentation guided by immunostaining vs. segmentation guided by predicted  
27 BASSOON signal using the F1 score, and found a high degree of similarity (F1=0.73 at  
28 intersection over union (IOU) threshold 0.5, **Fig. 2j,k, Supplementary Fig. 10**). For this,  
29 instance segmentations of our deep-learning-prediction and the corresponding ground-truth  
30 dataset were compared by identifying object-pairs and calculating their IOUs (ratio of  
31 overlapping volume vs. combined volume). The F1 score as a function of IOU takes into  
32 account the precision (number of correctly segmented objects divided by number of all  
33 segmented objects) and recall (number of correctly segmented objects divided by number of

1 all true objects). As expected, network predictions improved with the higher precision of super-  
 2 resolved compared to confocal molecular signals as input data for training (**Supplementary**  
 3 **Fig. 10**). Denoising with Noise2Void had a minor effect on prediction outcome  
 4 (**Supplementary Fig. 10**). These data demonstrate that deep-learning-based analysis within  
 5 the CATS framework has the power to reveal synaptic transmission sites, leveraging local  
 6 context and structural labeling of putative synaptic clefts.  
 7

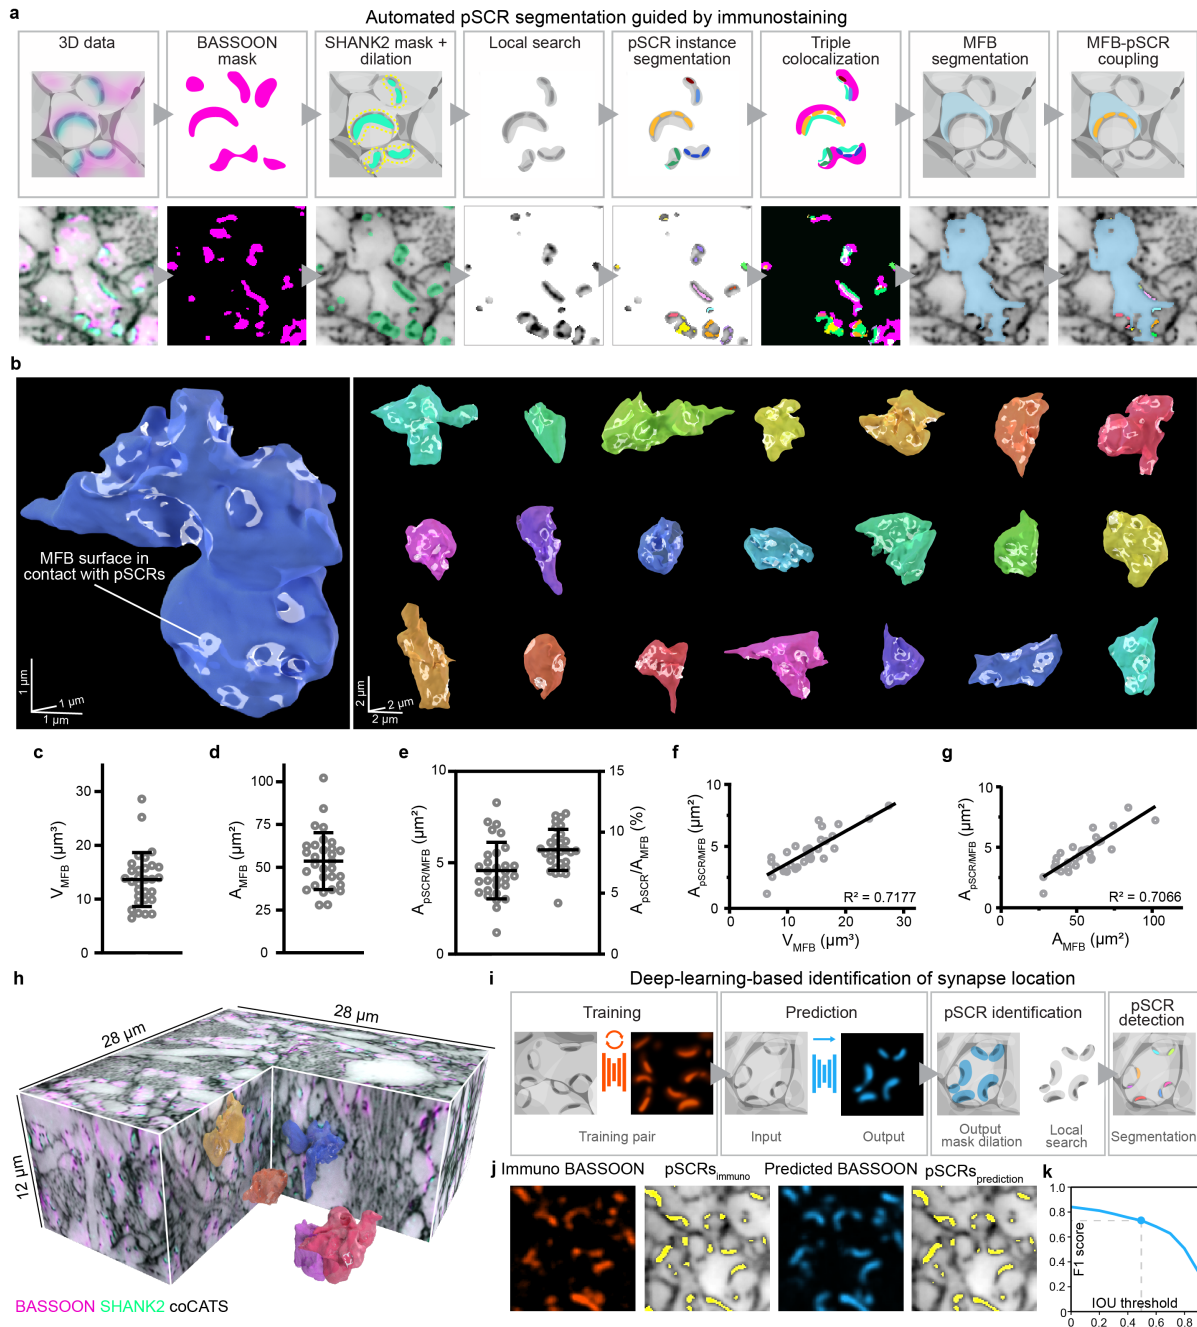

8  
 9 **Fig. 2| Quantifying synaptic connectivity and single-bouton properties.** CoCATS  
 10 analysis of hippocampal mossy fiber to CA3 pyramidal neuron synapses in adult mouse CA3

1 *stratum lucidum* by *in vivo* microinjection into the LV. **a**, Automated synapse detection guided  
2 by immunostaining for synaptic markers. High-intensity 3D-features in coCATS in proximity to  
3 synaptic markers are segmented and classified as pSCRs in case of triple colocalization  
4 between a pre-synaptic marker, the dense coCATS feature, and a post-synaptic marker.  
5 Detected pSCRs are then associated with manual volume segmentations of individual MFBs.  
6 Schematic (*top*) and single *xy*-planes of volumetric data (*bottom*) including coCATS (grey, z-  
7 STED), BASSOON (magenta, confocal) and SHANK2 (turquoise, z-STED) after denoising  
8 with Noise2Void (N2V, raw data: **Supplementary Fig. 7**). **b**, 3D-renderings of 22 randomly  
9 selected MFBs segmented from volumetric coCATS data at near-isotropic resolution (z-  
10 STED). MFB surface areas occupied by pSCRs are indicated in white. 3D-scale bars refer to  
11 bouton center. **c-e**, Quantification of MFB volume ( $V_{\text{MFB}}$ ), MFB surface area ( $A_{\text{MFB}}$ ), absolute  
12 ( $A_{\text{pSCR/MFB}}$ ) and relative area occupied by pSCRs on individual MFBs ( $A_{\text{pSCR/MFB}}/A_{\text{MFB}}$ )  
13 ( $n_{\text{MFB}}=30$ ). **f,g**,  $A_{\text{pSCR/MFB}}$  as a function of bouton volume and surface area with linear regression  
14 ( $n_{\text{MFB}}=30$ ). **h**, One of the imaging volumes used for MFB characterization (denoised with N2V,  
15 raw data: **Supplementary Fig. 7**) with coCATS (grey, z-STED), BASSOON (magenta,  
16 confocal) and SHANK2 (turquoise, z-STED), including manually segmented MFBs and  
17 automatically detected pSCRs. **i**, Deep-learning-based pSCR identification with training on  
18 paired structural (coCATS) and molecular (BASSOON immunostaining) super-resolved data.  
19 Prediction of synaptic marker location in unseen datasets is based on structural data alone.  
20 pSCRs are segmented similarly as in **a**, but using predicted BASSOON instead of  
21 immunostainings as guide to synaptic sites. **j**, Immunostained BASSOON (orange, z-STED)  
22 and BASSOON distribution predicted (blue) from coCATS structure in a dataset not included  
23 in the training. Corresponding pSCRs (yellow) segmented from coCATS data (grey, z-STED,  
24 N2V), guided by immunostained (pSCRs<sub>immuno</sub>) or predicted BASSOON (pSCRs<sub>prediction</sub>). **k**,  
25 Quantification of similarity between pSCRs<sub>immuno</sub> and pSCRs<sub>prediction</sub> by F1 score (ranging from  
26 0 to 1, combining precision and recall) as a function of intersection over union (IOU) threshold.

27

## 28 **Synaptic input structure of identified, functionally characterized hippocampal** 29 **neurons**

30 To combine structural and functional readout, we performed coCATS in organotypic  
31 hippocampal slice cultures (**Fig. 3a,b, Supplementary Video 3**) after whole-cell patch clamp  
32 recordings. CATS revealed pSCRs and provided comprehensive structural context to  
33 individual, electrophysiologically characterized neurons, including DG granule cells, CA1  
34 pyramidal neurons, CA3 interneurons, and CA3 pyramidal neurons, which were filled with  
35 fluorophores during recording for later identification (**Fig. 3c-e, Supplementary Fig. 11**).

1 Electrophysiological recordings during and after coCATS label application showed that  
2 neuronal activity (induced action potential generation) continued (**Supplementary Fig. 12**),  
3 demonstrating that cells were alive and functional at the time of fixation.  
4 CATS visualized electrophysiologically characterized neurons together with surrounding  
5 structures at near-isotropic STED resolution, revealing key information missing with sparse  
6 positive cellular labeling alone (**Fig. 3c,g**). We set out to determine the complete connectivity  
7 structure of a proximal dendrite (**Fig. 3g**). Proximity of pre- and post-synaptic structures is an  
8 unreliable predictor of synaptic connectivity<sup>41</sup>. However, with application of deep-learning-  
9 based pSCR segmentation followed by manual validation, coCATS allowed us to identify  
10 synaptically connected structures (**Supplementary Fig. 13**). We mapped the synaptic input  
11 structure of a proximal dendrite in an electrophysiologically characterized CA3 pyramidal  
12 neuron (**Fig. 3h, Supplementary Fig. 14**). From the coCATS data, we reconstructed 58  
13 structures (43 MFB- and 14 non-MFB structures synaptically connected to the dendrite of the  
14 recorded cell) to clarify the intricate 3D spatial arrangement of individual MFBs and their post-  
15 synaptic complex spines (**Fig. 3h,i, Supplementary Video 4**). MFBs contacting the same  
16 dendrite displayed a wide range of sizes, with smaller mean volume and larger spread (**Fig. 3j**,  
17  $6.85 \pm 5.95 \mu\text{m}^3$ ) than the manually selected MFBs in adult brain in Fig. 2, potentially reflecting  
18 an earlier developmental stage<sup>37</sup> in the ~20 days *in vitro* slice cultures. The volume distribution  
19 of spines (68 reconstructed) on the pyramidal neuron included large spines with highly  
20 complex shapes, i.e. quintessential thorny excrescences. However, the size distribution was  
21 strongly skewed towards small spines emanating from the shaft, also in contact with MFBs  
22 (**Fig. 3j**). We next evaluated connectivity of individual MFBs (**Fig. 3k**). Interestingly, only  
23 ~1/3 of MFBs formed connections with a single spine, whereas synaptic contact with multiple  
24 spines was more common, with single boutons connecting to up to 7 different spine structures.  
25 Conversely, individual, especially small, spines mostly connected to single MFBs, but some  
26 (16.4%), mostly elaborate, complex spines, were synaptically contacted by more than one MFB  
27 (e.g. **Fig. 3i**). We observed a maximum of 6 pre-synaptic boutons for the largest of the post-  
28 synaptic structures (**Fig. 3i**). Together, these data shed light on the complex organization of the  
29 mossy fiber circuitry, with signal integration at CA3 pyramidal neurons occurring even at the  
30 level of individual thorny excrescences. More broadly, it demonstrates the power of CATS to  
31 provide quantitative data on structural and functional connectivity.  
32



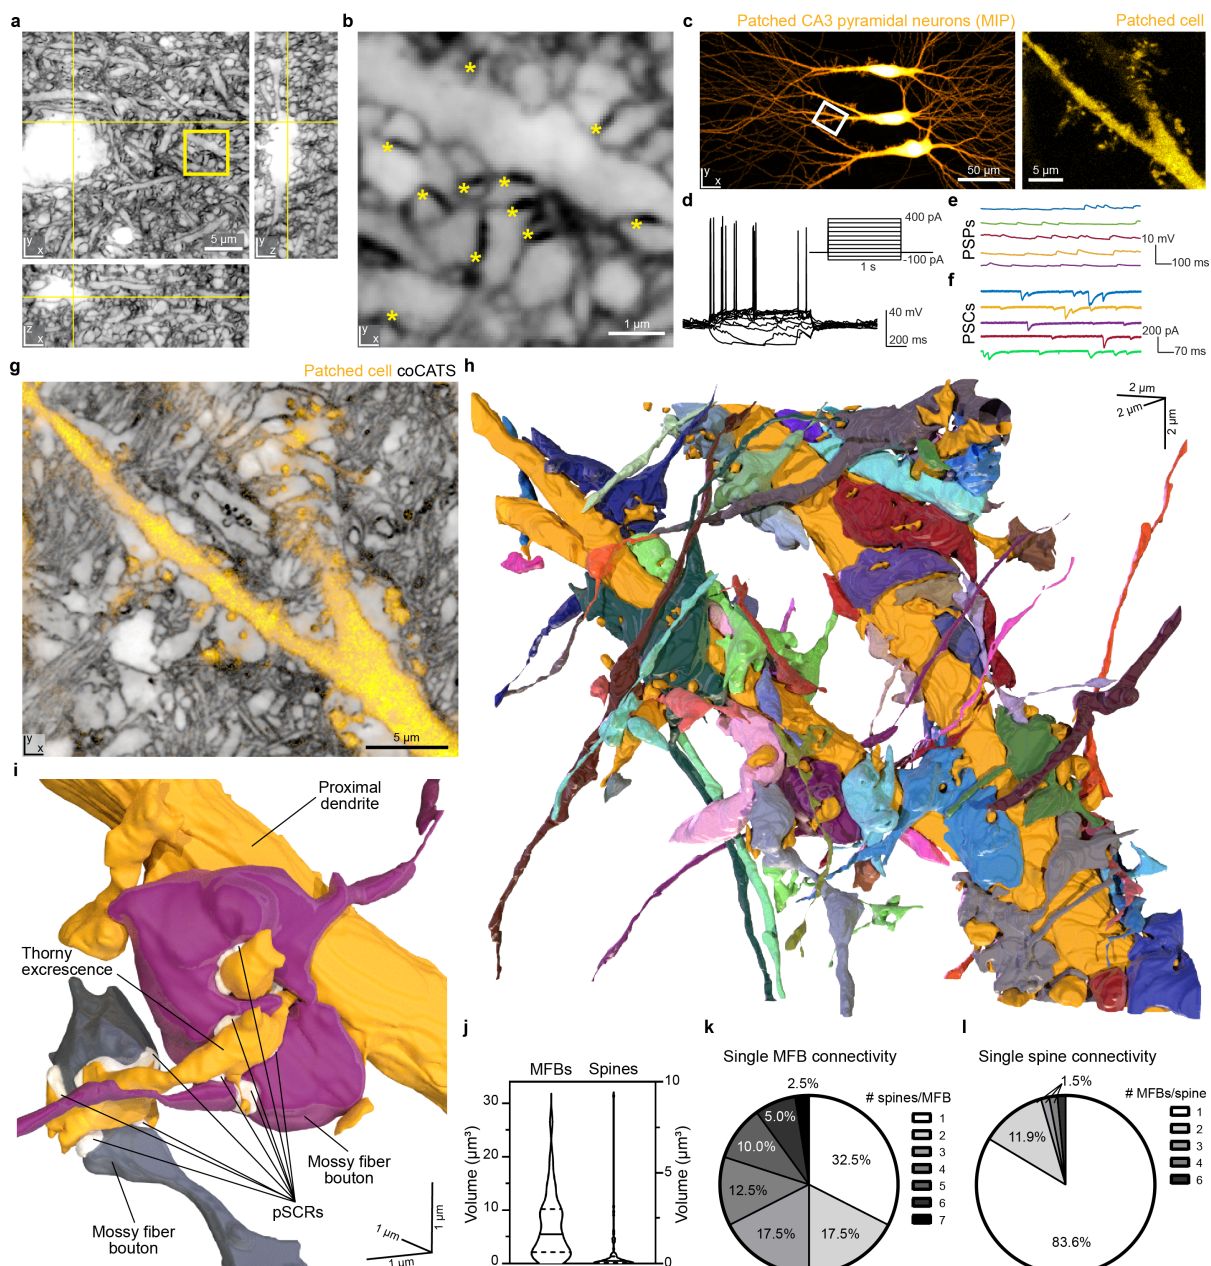

1  
2 **Fig. 3| Reconstruction of CA3 pyramidal neuron local input field with coCATS.** a,  
3 Orthogonal views of a coCATS imaging volume recorded with z-STED at near-isotropic  
4 resolution (N2V, raw data: **Supplementary Fig. 7**) in neuropil of an organotypic hippocampal  
5 brain slice. Yellow lines indicate position of displayed planes. **b**, Magnified view of the boxed  
6 region in **a**. Asterisks: pSCRs. **c**, (*Left*) CA3 pyramidal neurons in an organotypic hippocampal  
7 slice whole-cell patch-clamped and filled with fluorescent dye (Lucifer yellow). (*Right*)  
8 Magnified view of a piece of proximal dendrite in the boxed region. **d**, Action potential response  
9 of the middle pyramidal neuron elicited by current injection (inset). **e,f**, Spontaneous post-  
10 synaptic potentials (PSPs) and post-synaptic currents (PSCs) recorded from middle pyramidal  
11 neuron. **g**, CoCATS (grey, z-STED, N2V) overlaid with the intracellular label (yellow, confocal)  
12 of the middle pyramidal neuron provides super-resolved information on its local micro-

1 environment. **h**, 3D-rendering of the same proximal dendrite (gold) and 57 structures  
2 synaptically connected to it, reconstructed from the volumetric coCATS data. Connectivity was  
3 inferred by the presence of pSCRs between the positively labeled dendrite and the respective  
4 adjacent structures. **i**, 3D-rendering of two MFBs (violet, grey) forming complex connections  
5 with one thorny excrescence of the proximal dendrite. PSCRs are indicated in white. **j**, Violin  
6 plots with median (line) and quartiles (dashed lines) of the MFB volumes ( $n_{\text{MFB}}=40$ ) contacting  
7 the recorded pyramidal neuron and its spines ( $n_{\text{spine}}=68$ ). **k,l**, Quantification of connectivity  
8 pattern of individual MFBs and pyramidal neuron spines.

---

9

## 10 **Synaptic output structure and differential tissue architecture across regions**

11 We next took advantage of CATS' contextual information from single synapse to regional  
12 scale, characterizing the synaptic output field of an individual DG granule cell in an  
13 organotypic hippocampal slice culture. We performed coCATS labeling after  
14 electrophysiological recording (**Supplementary Fig. 15**) and biocytin-filling. We followed the  
15 main axon, as it travelled from the cell body in the DG granule cell layer through the hilus to  
16 the CA3 *stratum lucidum* (**Fig. 4a**). We performed volumetric, isotropically resolving STED  
17 imaging around 17 conspicuous pre-synaptic boutons, focusing mostly on complex boutons  
18 (**Fig. 4b,c**). While the axon trajectory and bouton structure could be determined already from  
19 the super-resolved positive single-cell label, CATS was required to identify post-synaptic  
20 partners via pSCR connectivity, evaluated by deep-learning-based segmentation and manual  
21 validation, and to reveal structural context (**Fig. 4c, Supplementary Fig. 15,16**). We analyzed  
22 complex mossy fiber boutons, but also smaller *en passant* boutons with identified pSCRs. *En*  
23 *passant* boutons displayed a single synaptic transmission site (one pSCR) to thin dendritic  
24 structures and lacked filopodia. In contrast, large boutons featured multiple pSCRs and  
25 filopodia in both the hilus ( $4.0\pm 2.0$  filopodia per analyzed bouton) and CA3 *stratum lucidum*  
26 ( $8.5\pm 3.4$  filopodia per bouton). These structures formed complex synapses with hilar mossy  
27 cells and CA3 pyramidal neurons, respectively, identifiable from their cellular morphology and  
28 context in CATS staining. We reconstructed synaptic units in the hilus (**Fig. 4d**,  
29 **Supplementary Video 5**) and the CA3 *stratum lucidum* (**Fig. 4e, Supplementary Video 6**),  
30 showing the difference in complexity between *en passant* boutons (boutons 2 and 4) and  
31 complex boutons (bouton 13). In CA3, we observed connections between bouton 13 and nine  
32 neuronal structures (**Fig. 4e**). These included both engulfment of thorny excrescences by the  
33 main bouton, and contacts via filopodial extensions. We also observed pSCRs at synapses

1 formed by filopodia, which are thought to mainly contact inhibitory interneurons, remarkably  
2 enhancing complexity of the circuitry<sup>42</sup>.  
3 Seeking to reveal tissue architecture beyond hippocampal circuitry, we returned to *in vivo*  
4 coCATS labeling. Microinjection into lateral ventricles or cortex (**Supplementary Fig. 17**)  
5 visualized the diversity of cell and tissue architecture in cerebral cortex, different areas of the  
6 hippocampus (dentate gyrus, CA1, CA3), striatum, corpus callosum, thalamus, hypothalamus,  
7 hindbrain and cerebellum (**Fig. 4f, Supplementary Fig. 18**). Tissue structure was intact  
8 beyond ~200  $\mu\text{m}$  of local damage around the injection site (**Supplementary Fig. 17**). STED  
9 disclosed rich structural detail of neuronal and glial processes, synapses, axon bundles, blood  
10 vessels, and ependyma in all these regions, with e.g. myelinated axons in the corpus callosum  
11 standing out by demarcation of the inner border of myelin sheaths (**Fig. 4f**).  
12



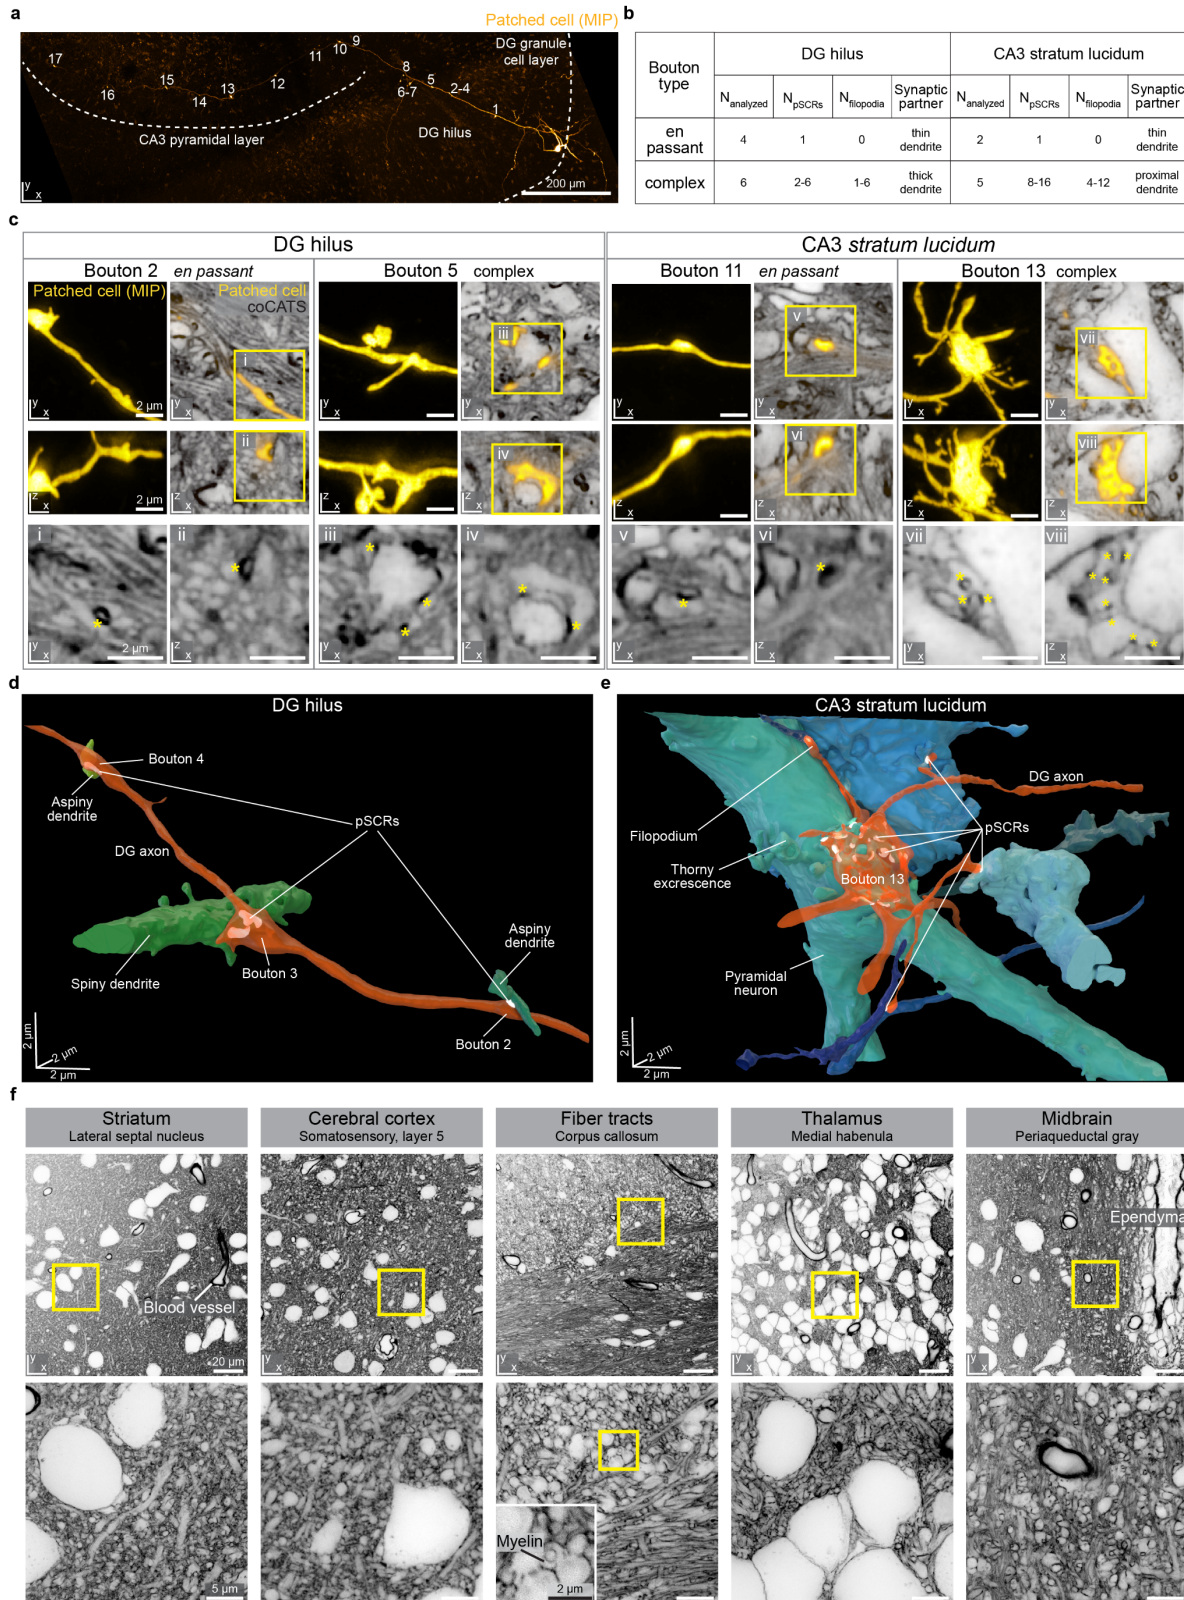

1  
2 **Fig. 4| Tissue architecture and single-cell output structure at individual synapse level**  
3 **across brain regions.** **a**, Maximum intensity projection (MIP) of a whole-cell patch-clamped  
4 and biocytin-filled DG granule cell in organotypic hippocampal slice (confocal). 17  
5 conspicuous boutons are marked along the main axon's trajectory, projecting as mossy fiber

1 from the DG granule cell layer through the hilus to the CA3 *stratum lucidum*. **b**, Characteristics  
2 of analyzed synaptic boutons. **c**, Single *xy*- and *xz*-planes of 4 example super-resolved  
3 volumes comprising specific synapses as marked in **a**, with coCATS (grey, z-STED, N2V)  
4 revealing local microenvironment of the positively labeled mossy fiber (yellow, z-STED, N2V)  
5 (raw data: **Supplementary Fig. 7**). (*Bottom*) Magnified views of the coCATS channel with  
6 asterisks indicating pSCRs used to identify synaptic partners. **d,e**, 3D-renderings of two axon  
7 stretches with boutons, pSCRs, and synaptically connected structures in DG hilus and CA3  
8 *stratum lucidum*. **f**, Architecture of various regions in near-natively preserved brain revealed  
9 by coCATS with *in vivo* microinjection. Organization of cell bodies, dendrites, axons,  
10 synapses, ependyma around liquor spaces, and blood vessels is visible. Myelinated axons  
11 can be distinguished by a fine demarcation of the inner border of the myelin sheath (inset,  
12 corpus callosum). (*Top*) Confocal, (*bottom*) *xy*-STED. Raw data.

---

13

#### 14 **Large-scale tissue analysis with CATS and expansion microscopy**

15 ExM involves hydrogel embedding, disruption of mechanical cohesiveness of the tissue, and  
16 subsequent isotropic swelling, while conserving relative spatial arrangements<sup>5</sup>. This provides  
17 effective super-resolution with diffraction-limited readout. It reduces autofluorescence and  
18 homogenizes sample refractive index to that of water, clearing the tissue and mitigating  
19 aberrations and scattering. Together, this facilitates acquisition of axially extended, super-  
20 resolved volumes. We therefore sought to combine CATS' capability to decode tissue  
21 architecture with the strengths of ExM. Expansion requires a label that is faithfully retained in  
22 the hydrogel and is minimally affected by the radical chemistry during gel polymerization and  
23 heat/chemical denaturation during preparation. Biotin fulfills these criteria, such that we  
24 screened for biotin-containing coCATS labels (**Supplementary Fig. 1**). We found that an  
25 additional chemical group was required to ensure sufficient extra-to-intracellular contrast and  
26 chose PEG<sub>12</sub>. We live labeled organotypic hippocampal slice cultures with NHS-PEG<sub>12</sub>-biotin,  
27 used heat/chemical denaturation (**Fig. 5a,b, Supplementary Fig. 19**) or enzymatic digestion  
28 (**Supplementary Fig. 19**) to disrupt tissue cohesiveness. We expanded ~4-fold with the  
29 magnified analysis of proteomes (MAP)<sup>6</sup> and protein-retention ExM<sup>8</sup> approaches, respectively,  
30 followed by application of fluorophore-conjugated streptavidin to visualize the extracellular  
31 label. This provided signal amplification and flexibility with downstream processing. We  
32 recorded confocal stacks of ~400  $\mu\text{m}$  axial range, showing that it is straightforward to obtain  
33 super-resolved context over 100  $\mu\text{m}$  depth at native tissue scale.

1 For several important preparations, in particular previously fixed brain, it is not possible to  
2 perform extracellular labeling while the tissue is alive. We therefore screened binders to ECS-  
3 resident molecules that were widely and homogeneously distributed in mouse brain (resident  
4 CATS, rCATS). Different polysaccharide-binding proteins showed distinct labeling patterns,  
5 highlighting the molecular diversity in the ECS (**Supplementary Fig. 20**). Wheat germ  
6 agglutinin (WGA) binds to N-acetyl-D-glucosamine and sialic acid and has been used in  
7 different organs to outline blood vessels or cell bodies<sup>43,44</sup>. Labeling fixed mouse brain tissue  
8 with fluorescently marked WGA revealed hippocampal architecture clearly (**Fig. 1b**).  
9 Myelinated axons were distinguishable in STED mode, as validated by specific staining  
10 (**Supplementary Fig. 21**), as well as carbohydrate-rich nuclear pores. However, WGA features  
11 few lysines for hydrogel anchoring, resulting in poor retention upon expansion  
12 (**Supplementary Fig. 22**). To make rCATS compatible with ExM, we developed a dedicated  
13 signal retention strategy (**Supplementary Fig. 22**), transferring information from biotinylated  
14 WGA to acrylamide-modified streptavidin copolymerizing with the gel. Large-scale readout  
15 of expanded samples with spinning disc confocal microscopy allowed high resolution  
16 visualization of tissue architecture (**Fig. 5c, Supplementary Fig. 23**). To illustrate the rich  
17 information contained in this type of data, we imaged a 1.4x1.7x0.32 mm<sup>3</sup> (post-expansion;  
18 expansion factor 4.5; 303x371x70 μm<sup>3</sup> pre-expansion; ~1 TB) volume of the DG crest and  
19 enclosed hilus, wherein rCATS provided structural context to sparse Thy1-EGFP labeled  
20 neurons and excitatory synapses labeled for SHANK2 (**Fig. 5d-f**). Given the large scale of the  
21 data, we skeletonized the major dendritic arborizations of an unlabeled example neuron from  
22 the rCATS signal. This cell, identified as a mossy cell by its morphology and the presence of  
23 multiple MFBs in contact with its dendrites, can be studied amidst its 3D-context,  
24 demonstrating the utility of rCATS for unbiased imaging and analysis of any neuronal  
25 population in the tissue (**Fig. 5f,g**).



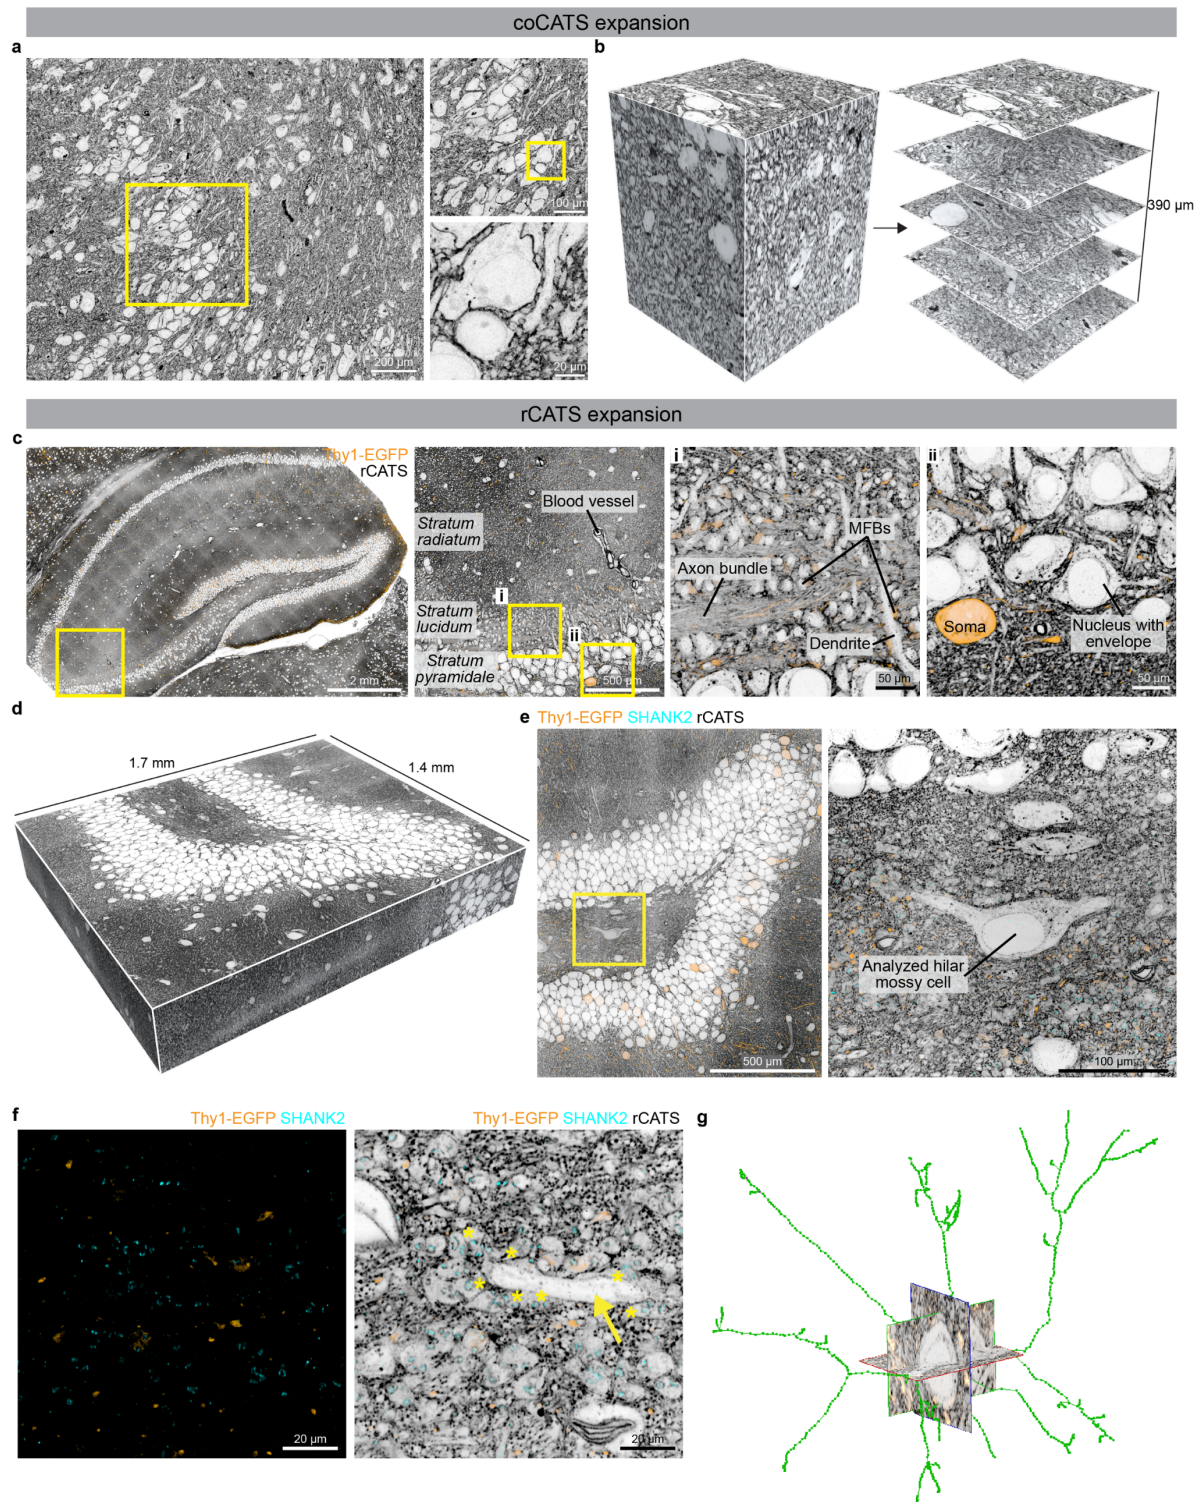

1  
2 **Fig. 5| Large-scale imaging of tissue context with expansion microscopy.** **a**, Organotypic  
3 hippocampal brain slice live labeled with coCATS (NHS-PEG<sub>12</sub>-biotin probe) and ~4-fold  
4 expanded with MAP<sup>6</sup>. Confocal image with two progressive zoom-ins (raw data). Scale bars  
5 refer to tissue size after expansion throughout. **b**, Extended depth imaging in ~4-fold expanded  
6 organotypic hippocampal brain slice after live coCATS labeling, showing the imaging volume  
7 (left) and five single planes at progressively larger depths (right). Axial imaging range in



1 confocal readout (N2V) was ~400  $\mu\text{m}$ , corresponding to ~100  $\mu\text{m}$  in the original tissue. **c**, Brain  
2 tissue section from previously perfusion-fixed Thy1-EGFP+ adult mouse with sparse neuronal  
3 labeling by cytosolic EGFP expression (visualized with immunostaining, orange), labeled with  
4 rCATS and ~4-fold expanded by protein-retention ExM<sup>8</sup>, showing full hippocampal area.  
5 Zoomed views in the CA3 at two different magnifications show that rCATS delineates tissue  
6 context from gross organization down to sub-cellular morphology (confocal, raw data). Zoom  
7 i shows mossy fiber boutons as globular structures among axon (mossy fiber) bundles in the  
8 *stratum lucidum*, zoom ii shows the arrangement of cell bodies and neuropil at the outer border  
9 of the *stratum pyramidale*. **d**, 3D-representation of a volume of the DG crest of a previously  
10 perfusion-fixed Thy1-EGFP+ adult mouse. After rCATS labeling (grey, N2V), immunostaining  
11 for SHANK2 (cyan, N2V) and EGFP (orange, N2V), the sample was 4.5-fold expanded and  
12 imaged with high-speed spinning disc microscopy. The displayed volume corresponds to  
13 303x371x70  $\mu\text{m}^3$  in original tissue volume. **e**, Single xy-plane of the data represented in d with  
14 zoom-in on the soma of a hilar mossy cell. **f**, Different plane from the same volume showing  
15 immunostainings alone and overlaid with rCATS at higher magnification. The yellow arrow  
16 indicates a dendrite belonging to the mossy cell displayed in e, lined by MFBs with SHANK2  
17 located at the synaptic transmission sites. Yellow asterisks highlight a subset of MFBs in  
18 contact with the mossy cell dendrite. **g**, Skeletonization of the major branches of the hilar  
19 mossy cell in e,f from rCATS data.

---

20

## 21 **CATS in human brain tissue**

22 Analysis of human clinical brain samples largely relies on conventional histology stainings,  
23 such as hematoxylin and eosin, that coarsely represent tissue architecture. To test whether  
24 CATS can be adopted to human samples, we obtained fixed hippocampal tissue extracted from  
25 a 36 year-old male patient undergoing epilepsy surgery. We applied rCATS at confocal  
26 resolution together with immunolabeling of neuronal processes (microtubule-associated  
27 protein 2, MAP2) and excitatory synapses (HOMER1). Also in the human samples, rCATS  
28 labeling revealed contextual information and differential architecture in the layers of the DG  
29 (**Fig. 6a,b**). In addition, comprehensive visualization by rCATS allowed detailed, yet  
30 straightforward, assessment of tissue preservation, the major quality determinant for  
31 microanatomical studies of clinical brain material. In contrast, immunostainings alone without  
32 rCATS made it challenging to distinguish effects of tissue degradation due to the sparse  
33 distribution patterns of target molecules. RCATS is thus a valuable resource for studying tissue  
34 structure and single-cell morphology in clinical specimens of healthy and diseased individuals.

1 Finally, we sought to demonstrate the applicability of CATS to human cerebral organoids.  
2 Organoids are emerging as an experimentally tractable human system for studying brain  
3 development and disease mechanisms<sup>45</sup>. We asked whether CATS could be extended to  
4 densely reconstruct the cellular constituents of an organoid volume. We chose coCATS, as it  
5 is independent of the deposition of extracellular matrix molecules in this early development  
6 model system. Using STED at near-isotropic resolution allowed dense cellular segmentation  
7 (**Fig. 6c-e, Supplementary Video 7**), making CATS useful for cell and tissue phenotyping  
8 also in this sample type. The organoid showed lower complexity than the other sample types  
9 analyzed. However, this proof-of-principle experiment paves the way towards large-scale  
10 dense reconstruction of complex tissue samples with light microscopy.

11

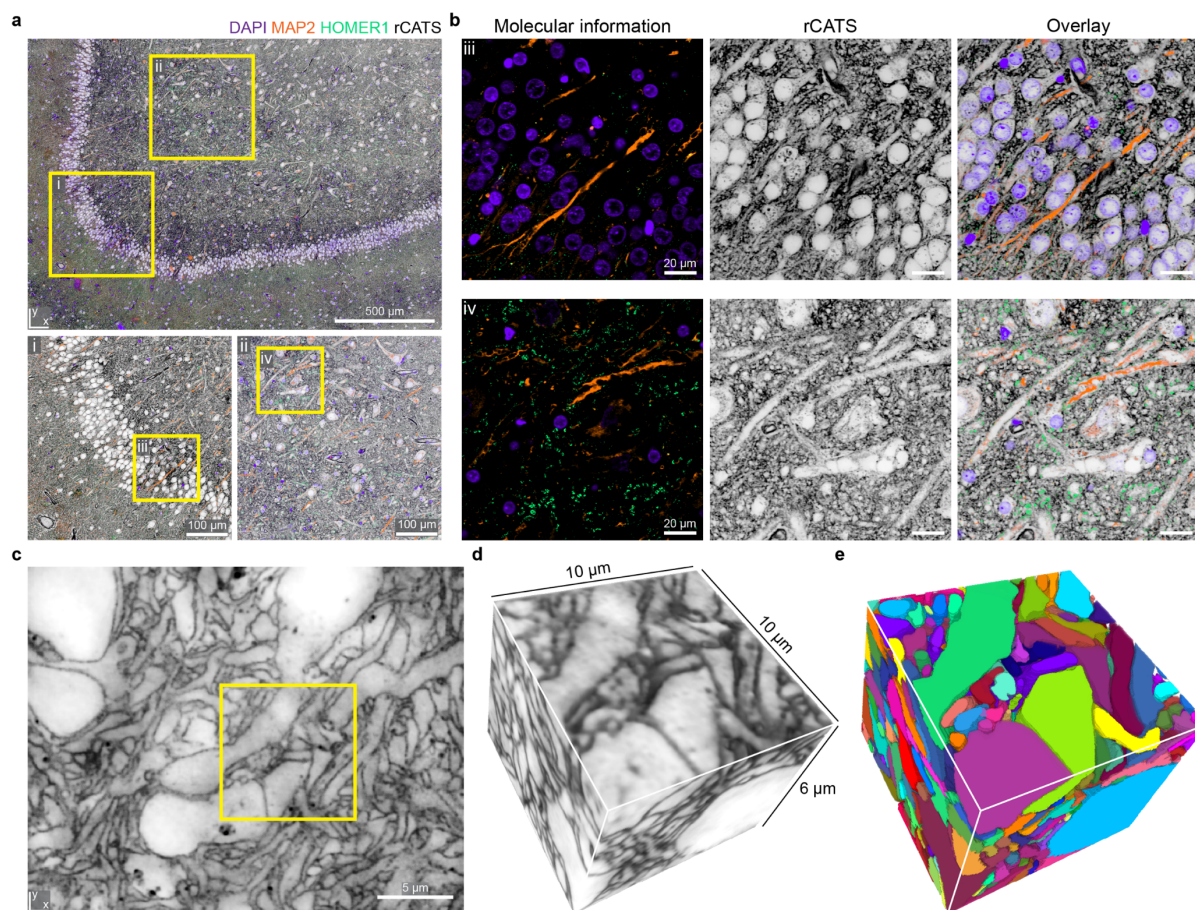

12

13 **Fig. 6| Tissue architecture in human nervous tissue. a**, RCATS (grey) in the DG-region of  
14 a human hippocampal surgery specimen with additional staining for dendrites (MAP2,  
15 orange), excitatory synapses (HOMER1, green) and nuclei (DAPI, purple). (*Top*) Confocal,  
16 with magnified views of boxed regions (*bottom*). **b**, Magnified views of the boxed regions iii  
17 and iv in a. (*Left*) Molecular stainings alone, (*middle*) tissue architecture revealed by rCATS,  
18 (*right*) overlay. Raw data. **c**, CoCATS in human cerebral organoid. Single plane of super-

1 resolved volume (z-STED, N2V, adaptive histogram equalization). **d**, Subvolume of the same  
2 dataset, as indicated in c. **e**, Dense tissue reconstruction with coCATS via manual  
3 segmentation of the volume in d.

---

4

## 5 **Discussion**

6 Here we developed CATS, a labeling, imaging, and analysis platform to map brain tissue  
7 architecture across spatial scales with light microscopy. CATS places cells and specific  
8 molecules into their tissue context, and allows quantifying neuronal connectivity and  
9 reconstructing tissue structure down to subcellular nano-morphology, including single  
10 synapses. Designed for fixed rather than living tissues, it facilitates analysis of diverse  
11 specimens and extended volumes, using readily available super-resolution approaches,  
12 specifically STED and expansion microscopy. Contrary to the selective representation with  
13 positive cellular labeling, CATS displays the tissue with all its cellular structures in an unbiased  
14 fashion. CATS labels molecules in extracellular space and on cell surfaces, with the structural  
15 imaging channel remaining free from intracellular complexity. This creates a clear boundary  
16 between cells and allows distinguishing cellular structures at high contrast in extremely dense  
17 brain tissue, even when read out at diffraction-limited resolution or comparatively moderate  
18 resolution increase over the diffraction limit. Together with broad compatibility with standard  
19 molecular labeling techniques, this property will facilitate widespread incorporation into tissue  
20 analysis workflows, dramatically advancing their information content.

21 We employed two labeling strategies, coCATS and rCATS, to cater for diverse brain tissue  
22 preparations, including native rodent brain, organotypic slice cultures, previously fixed mouse  
23 and human brain tissue, and human cerebral organoids. Broad labeling of extracellular  
24 molecules in coCATS and the resulting high labeling density enabled reconstruction of single  
25 synapse morphology, whereas rCATS extended usefulness to sample types that do not allow  
26 live labeling. CATS is a technologically straightforward approach to 3D tissue reconstruction  
27 in the vast number of applications where EM resolution is not essential and adds super-resolved  
28 molecular information to 3D reconstruction. By directly bridging spatial scales (mm–nm), it  
29 avoids complex correlative workflows that require reconciling different sample preparation  
30 and imaging modalities.

31 Obvious improvements include specifically engineering labels for enhanced hydrogel  
32 retention<sup>46</sup> or signal amplification and, in rCATS, multi-component labeling of extracellular  
33 molecules, as well as increasing readout speed with light-sheet microscopy<sup>14</sup>. CATS paves the

1 way towards development of molecularly informed, light-microscopy based connectomics. For  
2 this, specifically increasing optical resolution or expansion factors<sup>47–50,29,28</sup> should allow  
3 tracing also the thinnest of neuronal structures, finer than the resolution employed here.  
4 We used the hippocampal mossy fiber circuitry as first application target. Quantifications of  
5 single-bouton geometry and connectivity are in line with benchmark EM data<sup>36,38,39</sup>. However,  
6 in contrast to EM, CATS enabled straightforward incorporation of specific molecular  
7 information in 3D-reconstructions and massively reduced requirements in time, personnel and  
8 equipment over classical serial-sectioning EM studies. For example, imaging the three volumes  
9 used to reconstruct the 30 MFBs in **Fig. 2** required only ~4h hands-on sample preparation and  
10 3x1.5 h total imaging time for the 3-channel measurement.  
11 Taking advantage of comprehensive tissue visualization, we addressed a long-standing  
12 challenge in brain tissue imaging by applying CATS to decode synaptic connectivity. A  
13 surprising, but powerful discovery is that coCATS unveils putative synaptic cleft regions  
14 (pSCRs) by a prominent labeling pattern within its structural context. These are detectable with  
15 specifically tailored machine learning analysis even in absence of molecular staining.  
16 Accordingly, pSCRs can be leveraged to infer and quantify synaptic connections, and identify  
17 synaptic partners among neighboring structures. We used this to reconstruct the local synaptic  
18 input structure of an identified CA3 pyramidal neuron and to characterize the synaptic output  
19 structure of a DG granule cell when following its main axon across the hippocampus. In both  
20 cases our analysis revealed stunning complexity, showing CATS' power to unravel the  
21 structural correlates of diverging and converging signal integration in the central nervous  
22 system.  
23 Our analysis presents one of the largest datasets of local mossy fiber connectivity  
24 reconstruction to date. Throughput of 3D reconstruction was limited by manual volume  
25 segmentation. Overall throughput will substantially benefit from replacing manual cell shape  
26 segmentation with deep-learning-based approaches adopted from EM connectomics<sup>51–53</sup>, as  
27 already employed in super-resolution reconstruction of living brain tissue<sup>24</sup>. This will make  
28 large-scale studies of local connectivity, complete neuronal synaptic input or output fields, and  
29 neuron-glia interplay<sup>21</sup> feasible. We furthermore expect CATS to seamlessly integrate with  
30 complementary technologies, such as calcium imaging or viral circuit tracing<sup>54,55</sup>, similar to  
31 the combined structural and functional characterization demonstrated here with whole-cell  
32 patch clamp recordings. CATS will be an important tool to clarify how tissue architecture and  
33 synaptic connectivity are remodeled in response to neuronal activity, during development, or  
34 in neurodevelopmental or neurodegenerative disease models. CATS furthermore opens the



1 door to unbiased phenotyping of cell and tissue structure of rodent and patient-derived human  
2 samples, shedding new light on tissue architecture, cell-cell interactions, and subcellular  
3 morphology both in healthy and diseased brain. High throughput, easy adoptability, and  
4 seamless pairing of structural data with molecular and functional information puts CATS in an  
5 excellent position to clarify structure-function or genotype-to-tissue-phenotype relationships.  
6 Taken together, CATS is a powerful tool for phenotyping brain and provides unprecedented  
7 views into cellular microenvironments both in health and disease.

8

## 9 **References**

- 10 1. Klar, T. A., Jakobs, S., Dyba, M., Egner, A. & Hell, S. W. Fluorescence microscopy with  
11 diffraction resolution barrier broken by stimulated emission. *PNAS* **97**, 8206–8210  
12 (2000).
- 13 2. Betzig, E., Patterson, G. H., Sougrat, R., Lindwasser, O. W., Olenych, S., Bonifacino, J.  
14 S., Davidson, M. W., Lippincott-Schwartz, J. & Hess, H. F. Imaging Intracellular  
15 Fluorescent Proteins at Nanometer Resolution. *Science* **313**, 1642–1645 (2006).
- 16 3. Rust, M. J., Bates, M. & Zhuang, X. Sub-diffraction-limit imaging by stochastic optical  
17 reconstruction microscopy (STORM). *Nature Methods* **3**, 793–796 (2006).
- 18 4. Hess, S. T., Girirajan, T. P. K. & Mason, M. D. Ultra-High Resolution Imaging by  
19 Fluorescence Photoactivation Localization Microscopy. *Biophysical Journal* **91**, 4258–  
20 4272 (2006).
- 21 5. Chen, F., Tillberg, P. W. & Boyden, E. S. Expansion microscopy. *Science* **347**, 543–548  
22 (2015).
- 23 6. Ku, T., Swaney, J., Park, J.-Y., Albanese, A., Murray, E., Cho, J. H., Park, Y.-G.,  
24 Mangena, V., Chen, J. & Chung, K. Multiplexed and scalable super-resolution imaging  
25 of three-dimensional protein localization in size-adjustable tissues. *Nature Biotechnology*  
26 **34**, 973–981 (2016).
- 27 7. Chozinski, T. J., Halpern, A. R., Okawa, H., Kim, H.-J., Tremel, G. J., Wong, R. O. L. &  
28 Vaughan, J. C. Expansion microscopy with conventional antibodies and fluorescent  
29 proteins. *Nature Methods* **13**, 485–488 (2016).
- 30 8. Tillberg, P. W., Chen, F., Piatkevich, K. D., Zhao, Y., Yu, C.-C., English, B. P., Gao, L.,  
31 Martorell, A., Suk, H.-J., Yoshida, F., DeGennaro, E. M., Roossien, D. H., Gong, G.,  
32 Seneviratne, U., Tannenbaum, S. R., Desimone, R., Cai, D. & Boyden, E. S. Protein-  
33 retention expansion microscopy of cells and tissues labeled using standard fluorescent  
34 proteins and antibodies. *Nature Biotechnology* **34**, 987–992 (2016).
- 35 9. Dani, A., Huang, B., Bergan, J., Dulac, C. & Zhuang, X. Superresolution imaging of  
36 chemical synapses in the brain. *Neuron* **68**, 843–856 (2010).

- 1 10. Liu, K. S. Y., Siebert, M., Mertel, S., Knoche, E., Wegener, S., Wichmann, C., Matkovic,  
2 T., Muhammad, K., Depner, H., Mettke, C., Bückers, J., Hell, S. W., Müller, M., Davis,  
3 G. W., Schmitz, D. & Sigrist, S. J. RIM-Binding Protein, a Central Part of the Active  
4 Zone, Is Essential for Neurotransmitter Release. *Science* **334**, 1565–1569 (2011).
- 5 11. Tang, A.-H., Chen, H., Li, T. P., Metzbower, S. R., MacGillavry, H. D. & Blanpied, T.  
6 A. A trans-synaptic nanocolumn aligns neurotransmitter release to receptors. *Nature* **536**,  
7 210–214 (2016).
- 8 12. Xu, K., Zhong, G. & Zhuang, X. Actin, Spectrin, and Associated Proteins Form a  
9 Periodic Cytoskeletal Structure in Axons. *Science* **339**, 452–456 (2013).
- 10 13. Tønnesen, J., Katona, G., Rózsa, B. & Nägerl, U. V. Spine neck plasticity regulates  
11 compartmentalization of synapses. *Nature Neuroscience* **17**, 678–685 (2014).
- 12 14. Gao, R., Asano, S. M., Upadhyayula, S., Pisarev, I., Milkie, D. E., Liu, T.-L., Singh, V.,  
13 Graves, A., Huynh, G. H., Zhao, Y., Bogovic, J., Colonell, J., Ott, C. M., Zugates, C.,  
14 Tappan, S., Rodriguez, A., Mosaliganti, K. R., Sheu, S.-H., Pasolli, H. A., Pang, S., Xu,  
15 C. S., Megason, S. G., Hess, H., Lippincott-Schwartz, J., Hantman, A., Rubin, G. M.,  
16 Kirchhausen, T., Saalfeld, S., Aso, Y., Boyden, E. S. & Betzig, E. Cortical column and  
17 whole-brain imaging with molecular contrast and nanoscale resolution. *Science* **363**,  
18 eaau8302 (2019).
- 19 15. Kitamura, K., Judkewitz, B., Kano, M., Denk, W. & Häusser, M. Targeted patch-clamp  
20 recordings and single-cell electroporation of unlabeled neurons in vivo. *Nat Methods* **5**,  
21 61–67 (2008).
- 22 16. Godin, A. G., Varela, J. A., Gao, Z., Danné, N., Dupuis, J. P., Lounis, B., Groc, L. &  
23 Cognet, L. Single-nanotube tracking reveals the nanoscale organization of the  
24 extracellular space in the live brain. *Nature Nanotech* **12**, 238–243 (2017).
- 25 17. Tønnesen, J., Inavalli, V. V. G. K. & Nägerl, U. V. Super-Resolution Imaging of the  
26 Extracellular Space in Living Brain Tissue. *Cell* **172**, 1108-1121.e15 (2018).
- 27 18. Briggman, K. L., Helmstaedter, M. & Denk, W. Wiring specificity in the direction-  
28 selectivity circuit of the retina. *Nature* **471**, 183–188 (2011).
- 29 19. Hell, S. W. & Wichmann, J. Breaking the diffraction resolution limit by stimulated  
30 emission: stimulated-emission-depletion fluorescence microscopy. *Optics Letters* **19**,  
31 780–782 (1994).
- 32 20. Jahr, W., Velicky, P. & Danzl, J. G. Strategies to maximize performance in STimulated  
33 Emission Depletion (STED) nanoscopy of biological specimens. *Methods* **174**, 27–41  
34 (2020).
- 35 21. Arizono, M., Inavalli, V. V. G. K., Panatier, A., Pfeiffer, T., Angibaud, J., Levet, F., Ter  
36 Veer, M. J. T., Stobart, J., Bellocchio, L., Mikoshiba, K., Marsicano, G., Weber, B.,  
37 Oliet, S. H. R. & Nägerl, U. V. Structural basis of astrocytic Ca<sup>2+</sup> signals at tripartite  
38 synapses. *Nature Communications* **11**, 1–15 (2020).

- 1 22. Arizono, M., Inavalli, V. V. G. K., Bancelin, S., Fernández-Monreal, M. & Nägerl, U. V.  
2 Super-resolution shadow imaging reveals local remodeling of astrocytic microstructures  
3 and brain extracellular space after osmotic challenge. *Glia* **69**, 1605–1613 (2021).
- 4 23. Inavalli, V. V. G. K., Lenz, M. O., Butler, C., Angibaud, J., Compans, B., Levet, F.,  
5 Tønnesen, J., Rossier, O., Giannone, G., Thoumine, O., Hosy, E., Choquet, D., Sibarita,  
6 J.-B. & Nägerl, U. V. A super-resolution platform for correlative live single-molecule  
7 imaging and STED microscopy. *Nat Methods* **16**, 1263–1268 (2019).
- 8 24. Velicky, P., Miguel, E., Michalska, J. M., Wei, D., Lin, Z., Watson, J. F., Troidl, J.,  
9 Beyer, J., Ben-Simon, Y., Sommer, C., Jahr, W., Cenameri, A., Broichhagen, J., Grant, S.  
10 G. N., Jonas, P., Novarino, G., Pfister, H., Bickel, B. & Danzl, J. G. Saturated  
11 reconstruction of living brain tissue. 2022.03.16.484431 Preprint at  
12 <https://doi.org/10.1101/2022.03.16.484431> (2022)
- 13 25. M'Saad, O. & Bewersdorf, J. Light microscopy of proteins in their ultrastructural  
14 context. *Nature Communications* **11**, 3850 (2020).
- 15 26. Mao, C., Lee, M. Y., Jhan, J.-R., Halpern, A. R., Woodworth, M. A., Glaser, A. K.,  
16 Chozinski, T. J., Shin, L., Pippin, J. W., Shankland, S. J., Liu, J. T. C. & Vaughan, J. C.  
17 Feature-rich covalent stains for super-resolution and cleared tissue fluorescence  
18 microscopy. *Science Advances* **6**, eaba4542 (2020).
- 19 27. Klimas, A., Gallagher, B., Wijesekara, P., Fekir, S., Stolz, D., Cambi, F., Watkins, S.,  
20 Barth, A., Moore, C., Ren, X. & Zhao, Y. *Nanoscale Imaging of Biomolecules using*  
21 *Molecule Anchorable Gel-enabled Nanoscale In-situ Fluorescence Microscopy*. (In  
22 Review, 2021). doi:10.21203/rs.3.rs-858006/v1
- 23 28. Damstra, H. G., Mohar, B., Eddison, M., Akhmanova, A., Kapitein, L. C. & Tillberg, P.  
24 W. Visualizing cellular and tissue ultrastructure using Ten-fold Robust Expansion  
25 Microscopy (TReX). *eLife* **11**, e73775 (2022).
- 26 29. M'Saad, O., Kasula, R., Kondratiuk, I., Kidd, P., Falahati, H., Gentile, J. E., Niescier, R.  
27 F., Watters, K., Sterner, R. C., Lee, S., Liu, X., Camilli, P. D., Rothman, J. E., Koleske,  
28 A. J., Biederer, T. & Bewersdorf, J. All-optical visualization of specific molecules in the  
29 ultrastructural context of brain tissue. 2022.04.04.486901 Preprint at  
30 <https://doi.org/10.1101/2022.04.04.486901> (2022)
- 31 30. Qian, C., Miao, K., Lin, L.-E., Chen, X., Du, J. & Wei, L. Super-resolution label-free  
32 volumetric vibrational imaging. *Nat Commun* **12**, 3648 (2021).
- 33 31. Mori, M., Abegg, M. H., Gähwiler, B. H. & Gerber, U. A frequency-dependent switch  
34 from inhibition to excitation in a hippocampal unitary circuit. *Nature* **431**, 453–456  
35 (2004).
- 36 32. Vandael, D., Borges-Merjane, C., Zhang, X. & Jonas, P. Short-Term Plasticity at  
37 Hippocampal Mossy Fiber Synapses Is Induced by Natural Activity Patterns and  
38 Associated with Vesicle Pool Engram Formation. *Neuron* **107**, 509-521.e7 (2020).



- 1 33. Chicurel, M. E. & Harris, K. M. Three-dimensional analysis of the structure and  
2 composition of CA3 branched dendritic spines and their synaptic relationships with  
3 mossy fiber boutons in the rat hippocampus. *Journal of Comparative Neurology* **325**,  
4 169–182 (1992).
- 5 34. Perez de Arce, K., Schrod, N., Metzbower, S. W. R., Allgeyer, E., Kong, G. K.-W., Tang,  
6 A.-H., Krupp, A. J., Stein, V., Liu, X., Bewersdorf, J., Blanpied, T. A., Lucic, V. &  
7 Biederer, T. Topographic Mapping of the Synaptic Cleft into Adhesive Nanodomains.  
8 *Neuron* **88**, 1165–1172 (2015).
- 9 35. Krull, A., Buchholz, T.-O. & Jug, F. Noise2Void - Learning Denoising from Single  
10 Noisy Images. *arXiv:1811.10980 [cs]* (2019). at <<http://arxiv.org/abs/1811.10980>>
- 11 36. Wilke, S. A., Antonios, J. K., Bushong, E. A., Badkoobehi, A., Malek, E., Hwang, M.,  
12 Terada, M., Ellisman, M. H. & Ghosh, A. Deconstructing Complexity: Serial Block-Face  
13 Electron Microscopic Analysis of the Hippocampal Mossy Fiber Synapse. *J. Neurosci.*  
14 **33**, 507–522 (2013).
- 15 37. Galimberti, I., Gogolla, N., Alberi, S., Santos, A. F., Muller, D. & Caroni, P. Long-Term  
16 Rearrangements of Hippocampal Mossy Fiber Terminal Connectivity in the Adult  
17 Regulated by Experience. *Neuron* **50**, 749–763 (2006).
- 18 38. Rollenhagen, A., Sätzler, K., Rodríguez, E. P., Jonas, P., Frotscher, M. & Lübke, J. H. R.  
19 Structural Determinants of Transmission at Large Hippocampal Mossy Fiber Synapses. *J.*  
20 *Neurosci.* **27**, 10434–10444 (2007).
- 21 39. Martin, E. A., Woodruff, D., Rawson, R. L. & Williams, M. E. Examining Hippocampal  
22 Mossy Fiber Synapses by 3D Electron Microscopy in Wildtype and Kirrel3 Knockout  
23 Mice. *eNeuro* **4**, ENEURO.0088-17.2017 (2017).
- 24 40. Ounkomol, C., Seshamani, S., Maleckar, M. M., Collman, F. & Johnson, G. R. Label-free  
25 prediction of three-dimensional fluorescence images from transmitted-light microscopy.  
26 *Nat Methods* **15**, 917–920 (2018).
- 27 41. Kasthuri, N., Hayworth, K. J., Berger, D. R., Schalek, R. L., Conchello, J. A., Knowles-  
28 Barley, S., Lee, D., Vázquez-Reina, A., Kaynig, V., Jones, T. R., Roberts, M., Morgan, J.  
29 L., Tapia, J. C., Seung, H. S., Roncal, W. G., Vogelstein, J. T., Burns, R., Sussman, D.  
30 L., Priebe, C. E., Pfister, H. & Lichtman, J. W. Saturated Reconstruction of a Volume of  
31 Neocortex. *Cell* **162**, 648–661 (2015).
- 32 42. Acsády, L., Kamondi, A., Sík, A., Freund, T. & Buzsáki, G. GABAergic Cells Are the  
33 Major Postsynaptic Targets of Mossy Fibers in the Rat Hippocampus. *Journal of*  
34 *Neuroscience* **18**, 3386–3403 (1998).
- 35 43. Kishi, J. Y., Lapan, S. W., Beliveau, B. J., West, E. R., Zhu, A., Sasaki, H. M., Saka, S.  
36 K., Wang, Y., Cepko, C. L. & Yin, P. SABER amplifies FISH: enhanced multiplexed  
37 imaging of RNA and DNA in cells and tissues. *Nat Methods* **16**, 533–544 (2019).

- 1 44. Todorov, M. I., Paetzold, J. C., Schoppe, O., Tetteh, G., Shit, S., Efremov, V., Todorov-  
2 Völgyi, K., Düring, M., Dichgans, M., Piraud, M., Menze, B. & Ertürk, A. Machine  
3 learning analysis of whole mouse brain vasculature. *Nat Methods* **17**, 442–449 (2020).
- 4 45. Lancaster, M. A., Renner, M., Martin, C.-A., Wenzel, D., Bicknell, L. S., Hurles, M. E.,  
5 Homfray, T., Penninger, J. M., Jackson, A. P. & Knoblich, J. A. Cerebral organoids  
6 model human brain development and microcephaly. *Nature* **501**, 373–379 (2013).
- 7 46. Wen, G., Vanheusden, M., Acke, A., Valli, D., Neely, R. K., Leen, V. & Hofkens, J.  
8 Evaluation of Direct Grafting Strategies via Trivalent Anchoring for Enabling Lipid  
9 Membrane and Cytoskeleton Staining in Expansion Microscopy. *ACS Nano* (2020).  
10 doi:10.1021/acsnano.9b09259
- 11 47. Chang, J.-B., Chen, F., Yoon, Y.-G., Jung, E. E., Babcock, H., Kang, J. S., Asano, S.,  
12 Suk, H.-J., Pak, N., Tillberg, P. W., Wassie, A. T., Cai, D. & Boyden, E. S. Iterative  
13 expansion microscopy. *Nature Methods* **14**, 593–599 (2017).
- 14 48. Truckenbrodt, S., Maidorn, M., Crzan, D., Wildhagen, H., Kabatas, S. & Rizzoli, S. O.  
15 X10 Expansion Microscopy Enables 25 nm Resolution on Conventional Microscopes.  
16 *EMBO Reports* (2018). doi:10.1101/172130
- 17 49. Truckenbrodt, S., Sommer, C., Rizzoli, S. O. & Danzl, J. G. A practical guide to  
18 optimization in X10 expansion microscopy. *Nature Protocols* **14**, 832–863 (2019).
- 19 50. Park, H. E., Choi, D., Park, J. S., Sim, C., Park, S., Kang, S., Yim, H., Lee, M., Kim, J.,  
20 Pac, J., Rhee, K., Lee, J., Lee, Y., Lee, Y. & Kim, S. Y. Scalable and Isotropic Expansion  
21 of Tissues with Simply Tunable Expansion Ratio. *Advanced Science* **6**, (2019).
- 22 51. Lin, Z., Wei, D., Lichtman, J. & Pfister, H. *PyTorch Connectomics: A Scalable and*  
23 *Flexible Segmentation Framework for EM Connectomics*. (arXiv, 2021).  
24 doi:10.48550/arXiv.2112.05754
- 25 52. Lee, K., Zung, J., Li, P., Jain, V. & Seung, H. S. Superhuman Accuracy on the SNEMI3D  
26 Connectomics Challenge. *arXiv preprint arXiv:1706.00120* (2017).
- 27 53. Januszewski, M., Kornfeld, J., Li, P. H., Pope, A., Blakely, T., Lindsey, L., Maitin-  
28 Shepard, J., Tyka, M., Denk, W. & Jain, V. High-precision automated reconstruction of  
29 neurons with flood-filling networks. *Nature Methods* **15**, 605–610 (2018).
- 30 54. Wickersham, I. R., Finke, S., Conzelmann, K.-K. & Callaway, E. M. Retrograde neuronal  
31 tracing with a deletion-mutant rabies virus. *Nat Methods* **4**, 47–49 (2007).
- 32 55. Ben-Simon, Y., Kaefer, K., Velicky, P., Csicsvari, J., Danzl, J. G. & Jonas, P. Entorhinal  
33 layer 6b subplate neurons govern spatial learning and memory. *bioRxiv*  
34 2022.01.26.477814 (2022). doi:10.1101/2022.01.26.477814

35

36

## 1 **Acknowledgements**

2 We thank Jakob Vorlauffer, Nathalie Agudelo-Dueñas, Wiebke Jahr and Andreas Wartak for  
3 microscope maintenance and troubleshooting, as well as Caroline Kreuzinger and Anna  
4 Freeman for technical assistance. We gratefully acknowledge Eder Miguel for setting up  
5 webKnossos and Marek Šuplata for computational support and hardware control. We are  
6 grateful to Ryuichi Shigemoto and Bernd Bickel for generous support, and Michael Sixt and  
7 Scott Boyd (Stanford University) for discussions and critical reading of the manuscript.  
8 PSD95-HaloTag mice were kindly provided by Seth Grant (University of Edinburgh). We  
9 acknowledge expert support by the scientific service units of the Institute of Science and  
10 Technology Austria, including scientific computing, imaging and optics, preclinical, and life  
11 science facilities, and by the Miba machine shop.

12 We gratefully acknowledge funding by the following sources:

13 Austrian Science Fund (FWF) grant I3600-B27 (JGD)

14 Austrian Science Fund (FWF) grant DK W1232 (JGD)

15 Austrian Science Fund (FWF) grant Z 312-B27, Wittgenstein award (PJ)

16 Gesellschaft für Forschungsförderung NÖ (NFB) grant LSC18-022 (JGD)

17 European Union's Horizon 2020 research and innovation programme, European Research  
18 Council (ERC) grant 715508 – REVERSEAUTISM (GN)

19 European Union's Horizon 2020 research and innovation programme, European Research  
20 Council (ERC) grant 692692 – GIANTSYN (PJ)

21 Marie Skłodowska-Curie Actions Individual Fellowship 101026635 under the EU Horizon  
22 2020 program (JFW)

23

## 24 **Author contributions**

25 JMM and JGD designed the study, experiments, and analysis and interpreted data. JMM  
26 performed experiments, analysis, proofreading, and visualization, prepared figures and  
27 contributed to manuscript writing. JL designed and performed analysis, visualized and  
28 interpreted data, prepared figures and contributed to manuscript writing. PV supported  
29 experiments. HK performed stereotactic injections. JFW performed patch-clamp experiments.  
30 AC performed manual segmentations. CS supported image analysis. AV, KR, TC, and SS  
31 provided human brain surgery specimens. GN advised on and provided human cerebral  
32 organoids. PJ supervised patch clamp experiments and advised on synaptic neuroscience and  
33 hippocampal circuitry. JGD initiated and supervised the study. JGD wrote the manuscript with  
34 critical input from all authors.

35
